# Supplementary material for: S2k-Leitlinie: Diagnostik bei Verdacht auf eine Betalaktamantibiotika-Überempfindlichkeit
Source: Springer Nature journal article supplement (doi:10.1007/s15007-019-1876-z), 2019-07-30
Supplement: MOESM1 [file 17023212]

**Abbildung 1: Betalaktamantibiotika – Strukturformeln/R1- und R2-Seitenkette**

| Penicilline                                                                                                                                                                                                                                                                                                                                                                                          |                                                                                                                                                                                                                 |                                                                                      |  |
|------------------------------------------------------------------------------------------------------------------------------------------------------------------------------------------------------------------------------------------------------------------------------------------------------------------------------------------------------------------------------------------------------|-----------------------------------------------------------------------------------------------------------------------------------------------------------------------------------------------------------------|--------------------------------------------------------------------------------------|--|
| <p>Benzylpenicillin (Penicillin G) und Depotformen</p>                                                                                                                                                                                                                                                                                                                                               | 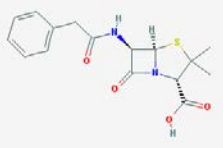                                                                                                                               |    |  |
| <p>Benzylpenicillin-Natrium<br/>Synonym: Penicillin G<br/>Natrium<br/>Handelsname: Infectocillin® (D), Penicillin G INFECTOPHARM® (D), Penicillin G-Natrium Sandoz® (A)</p>                                                                                                                                                                                                                          |                                                                                                                                |    |  |
| <p>Benzylpenicillin-Benzathin<br/>Synonym: Penicillin G Benzathin<br/>Handelsname: Pendysin® (D), Retarpen® (A), Tardocillin® (D)</p>                                                                                                                                                                                                                                                                | <p>Benzylpenicillin und Benzathin</p> <br> |    |  |
| Penicillinaseleibale Oralpenicilline                                                                                                                                                                                                                                                                                                                                                                 |                                                                                                                                                                                                                 |                                                                                      |  |
| <p>Phenoxyethylpenicillin-Kalium<br/>Synonym: Penicillin V<br/>Handelsnamen: Arcasin® (D), Infectocillin® (D), Isocillin® (D), OSPEN® (A), Penbene® (A), Penicillin V Heumann (D), Penicillin V AbZ (D), Penicillin V acis (D), Penicillin V-CT (D), Penicillin V-ratiopharm (D), Phenoxyethylpenicillin Kalium Sandoz® (A), Penstad V® (A), Pen-V Genericon (A), Pen V G.L.® (A), Star-Pen® (A)</p> |                                                                                                                              |  |  |

|                                                                                                                                                                                                                                                                                                                                                                                                                                                                                                                                                                                                                                                                                                                                                                                                                                                                                                                                                                                          |                                                                                                                                |                                                                                      |  |
|------------------------------------------------------------------------------------------------------------------------------------------------------------------------------------------------------------------------------------------------------------------------------------------------------------------------------------------------------------------------------------------------------------------------------------------------------------------------------------------------------------------------------------------------------------------------------------------------------------------------------------------------------------------------------------------------------------------------------------------------------------------------------------------------------------------------------------------------------------------------------------------------------------------------------------------------------------------------------------------|--------------------------------------------------------------------------------------------------------------------------------|--------------------------------------------------------------------------------------|--|
| <p>Phenoxymethylpenicillin-Benzathin<br/>         Synonym:<br/>         Handelsname:<br/>         InfectoBicillin® (D), Ospen® (A)</p>                                                                                                                                                                                                                                                                                                                                                                                                                                                                                                                                                                                                                                                                                                                                                                                                                                                   | <p>Phenoxymethylpenicillin und Benzathin</p> 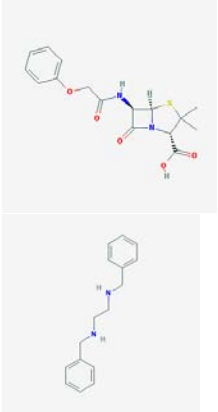 |    |  |
| <p>Breitspektrumpenicilline aus der Gruppe der Aminopenicilline</p>                                                                                                                                                                                                                                                                                                                                                                                                                                                                                                                                                                                                                                                                                                                                                                                                                                                                                                                      |                                                                                                                                |                                                                                      |  |
| <p>Amoxicillin<br/>         Synonym:<br/>         Handelsname: Amoxi-CT® (D), Amoxisaar® (D), Amoxicillin AbZ (D), Amoxicillin Heumann (D), Amoxicillin Hexal® (A), Amoxillin-MIP® (A), Amoxicillin-ratiopharm® (A, D), Amoxicillin Sandoz® (A), Amoxicillin 1A Pharma® (A), Amoxilan® (A), Amoxistad® (A), InfectoMox (D), Ospamox® (A)</p> <p>Kombinationspräparate mit Clavulansäure:<br/>         Amoxillin/Clavulansäure Actavis® (A), Amoxicillin/Clavulansäure A.Med (A), Amoxicillin/Clavulansäure Krka® (A), Amoxicillin/Clavulansäure Mikro Labs® (A), Amoxiclavan 1A Pharma® (A), Amoxicomp Genericon® (A), AmoxiPlus "ratiopharm"® (A), Amoxisaar® plus (D), Amoxillin plus Heumann (D), Amoxillin-ratiopharm comp (D), Amoxicillin-Clavulansäure Heumann (D), Amoxiclav-CT (D), Amoxistad plus® (A), Augmentan® (D), Augmentin® (A), Clavamox® (A), Curam® (A), InfectoSupramox® (D), Xiclav (A)®</p> <p>Kombinationspräparat mit Flucloxacillin-Natrium: Flanamox® (D)</p> |                                               |    |  |
| <p>Ampicillin</p>                                                                                                                                                                                                                                                                                                                                                                                                                                                                                                                                                                                                                                                                                                                                                                                                                                                                                                                                                                        |                                             |  |  |

|                                                                                                                                                                                                                            |                                                                                                                    |                                                                                      |  |
|----------------------------------------------------------------------------------------------------------------------------------------------------------------------------------------------------------------------------|--------------------------------------------------------------------------------------------------------------------|--------------------------------------------------------------------------------------|--|
| <p>Ampicillin-Natrium<br/>Handelsname: Ampicillin-ratiopharm® (D), Standacillin (A)<br/>Kombinationspräparate mit Sulbactam: Ampicillin und Sulbactam IBI (D), Ampicillin/Sulbactam Kabi (D), Unacid® (D), Unasyn® (A)</p> | 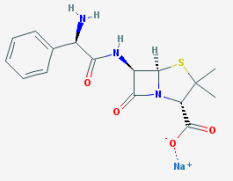                                  |    |  |
| <p>Sultamicillin</p>                                                                                                                                                                                                       |                                   |                                                                                      |  |
| <p>Sultamicillintosilat<br/>Handelsname: Sultamicillin-ratiopharm® (D)<br/>Sultamicillintosilatdihydrat<br/>Handelsname: Unacid® PD oral (D), Unasyn FTbl® (A)</p>                                                         | <p>Sultamicillin und Tosilat</p>  |                                                                                      |  |
| <p>Penicillinaseresistente Penicilline aus der Gruppe der Isoxazolypenicilline</p>                                                                                                                                         |                                                                                                                    |                                                                                      |  |
| <p>Oxacillin<br/>In A/D nicht im Handel</p>                                                                                                                                                                                |                                 |  |  |
| <p>Flucloxacillin</p>                                                                                                                                                                                                      |                                 |  |  |
| <p>Flucloxacillin-Natrium<br/>Handelsname: Floxapen® (A), Fluclo Stragen® (D), Flucloxacillin Altamedics (D), Flucloxacillin GSB® (A)<br/>In Kombination mit Amoxicillin: Flanamox® (D)</p>                                |                                 |  |  |

|                                                                                                                                                                                                                                                                                                                                                                                                                                                                                                                                                                                                  |                                                                                     |                                                                                      |  |
|--------------------------------------------------------------------------------------------------------------------------------------------------------------------------------------------------------------------------------------------------------------------------------------------------------------------------------------------------------------------------------------------------------------------------------------------------------------------------------------------------------------------------------------------------------------------------------------------------|-------------------------------------------------------------------------------------|--------------------------------------------------------------------------------------|--|
| Dicloxacillin                                                                                                                                                                                                                                                                                                                                                                                                                                                                                                                                                                                    | 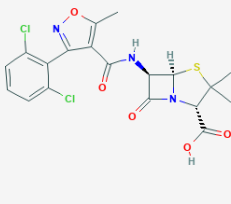   |    |  |
| <b>Acylaminopenicilline mit Wirkung auch gegen Pseudomonas Aeruginosa</b>                                                                                                                                                                                                                                                                                                                                                                                                                                                                                                                        |                                                                                     |                                                                                      |  |
| Piperacillin                                                                                                                                                                                                                                                                                                                                                                                                                                                                                                                                                                                     |    |    |  |
| <p>Piperacillin-Natrium<br/> Handelsnamen: Piperacillin ibisqus (D)<br/> In Kombination mit Tazobactam-Natrium: Piperacillin/Tazobactam Arcana® (A), Piperacillin/Tazobactam Astro® (A), Piperacillin + Tazobactam Eberth® (D), Piperacillin/Tazobactam Ibigen® (A), Piperacillin/Tazobactam IBISQUS (D), Piperacillin/Tazobactam Kabi (D), Piperacillin/Tazobactam Noriderm® (A), Piperacillin/Tazobactam Pfizer® (A), Piperacillin/Tazobactam Sandoz® (A), Piperacillin/Tazobactam Stragen (D), Piperacillin/Tazobactam Stravencon® (A), Piperacillin/Tazobactam-Teva® (D), Pipetazan® (A)</p> |   |   |  |
| Mezlocillin                                                                                                                                                                                                                                                                                                                                                                                                                                                                                                                                                                                      |  |  |  |
| <p>Mezlocillin-Natrium<br/> Handelsname: Mezlocillin Carino (D)</p>                                                                                                                                                                                                                                                                                                                                                                                                                                                                                                                              |  |  |  |

| Amidinopenicilline                                                                                                                                                                         |                                                                                     |                                                                                      |                                                                                       |
|--------------------------------------------------------------------------------------------------------------------------------------------------------------------------------------------|-------------------------------------------------------------------------------------|--------------------------------------------------------------------------------------|---------------------------------------------------------------------------------------|
| <p>Pivmecillinam<br/>Handelsname: Pivmelam® (D),<br/>Selexid® (A), X-Systo® (D)</p>                                                                                                        | 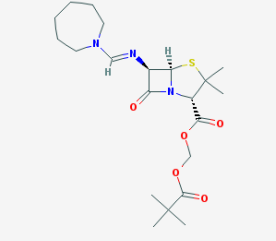   |    |                                                                                       |
| Cephalosporine                                                                                                                                                                             |                                                                                     |                                                                                      |                                                                                       |
| Gruppe I (penicillinase stabil, hauptsächlich gegen grampositive Keime wirksam)                                                                                                            |                                                                                     |                                                                                      |                                                                                       |
| <p>Cefaclor<br/>Handelsnamen: Cec Sandoz® (A),<br/>Ceclor® (A), Cefaclor Heumann (D),<br/>Cefaclor-ratiopharm® (D), Cefaclor<br/>ratiopharm TS (D), Cefastad® (A),<br/>Infectocef® (D)</p> |    |    |                                                                                       |
| <p>Cefalexin<br/>Handelsname: Cephalex CT (D),<br/>Cephalexin-ratiopharm® (D),<br/>Cephalobene® (A), Keflex® (A),<br/>Ospexin® (A), Sanaxin® (A)</p>                                       |   |   |                                                                                       |
| <p>Cefadroxil<br/>Handelsname: Biodroxil® (A),<br/>Grüncef® (D)</p>                                                                                                                        |  |  |                                                                                       |
| <p>Cefazolin</p>                                                                                                                                                                           |  |  |  |
| <p>Cefazolin-Natrium<br/>Handelsname: Cefazolin Sandoz® (A),<br/>Cefazolin-MIP® (A), Cefazolin-saar®<br/>(D), Cephalozin Fresenius (D), Kefzol®<br/>(A), Servazolin® (A)</p>               |  |  |  |

**Gruppe II (stärker gegen gramnegative Bakterien wirksam, noch ausreichend gegen grampositive Bakterien wirksam)**

|                                                                                                                                                                                                                                                                                                                                    |                                                                                    |                                                                                     |                                                                                     |
|------------------------------------------------------------------------------------------------------------------------------------------------------------------------------------------------------------------------------------------------------------------------------------------------------------------------------------|------------------------------------------------------------------------------------|-------------------------------------------------------------------------------------|-------------------------------------------------------------------------------------|
| <p>Cefuroxim</p>                                                                                                                                                                                                                                                                                                                   | 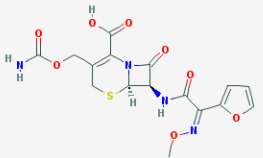  |   |  |
| <p>Cefuroxim-Natrium<br/>Handelsnamen: Aprokam® (A, D), Cefuroxim "Astro"® (A), Cefuroxim Dr. Eberth® (A), Cefuroxim Fresenius (A, D), Cefuroxim Hikma® (A), Cefuroxim-ratiopharm p.i (D), Cefuroxim-MIP® (A), Cefuroxim-saar® (D), Cefuroxim Sandoz® (A), Cefuroxim Stravencon® (A), Curocef® (A), Ximaract® (A, D)</p>           |   |   |  |
| <p>Cefuroximaxetil<br/>Handelsnamen: Cefuroxim AbZ (D), Cefuroxim Heumann (D), Cefuroxim Hexal (A), Cefuroxim Krka® (A), Cefuroxim Sandoz® (A), Cefuroxim 1APharma® (A), Cefuroxim-CT (D), Cefuroxim-ratiopharm® TS (D), Cefuroxim-ratiopharm® Filmtabletten (D), Cefuroxim-saar® Filmtabletten (D), Elobact® (D), Zinnat® (A)</p> |  |  |  |

**Gruppe III (sehr gut im gramnegativen Bereich wirksam, schwach im grampositiven Bereich)**

|                                                                                                       |                                                                                     |                                                                                      |                                                                                       |
|-------------------------------------------------------------------------------------------------------|-------------------------------------------------------------------------------------|--------------------------------------------------------------------------------------|---------------------------------------------------------------------------------------|
| <p>Cefixim<br/>Handelsname: Aerocef® (A), Cefixim Incef® (A), InfectoOptcef Soft (D), Tricef® (A)</p> | 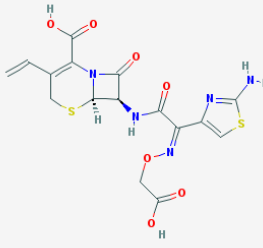 |  |  |
| <p>Cefotaxim</p>                                                                                      |  |  |  |

|                                                                                                                                                                                                                                                                              |                                                                                     |                                                                                      |                                                                                       |
|------------------------------------------------------------------------------------------------------------------------------------------------------------------------------------------------------------------------------------------------------------------------------|-------------------------------------------------------------------------------------|--------------------------------------------------------------------------------------|---------------------------------------------------------------------------------------|
| <p>Cefotaxim-Natrium<br/>Handelsname: Cefotaxim Eberth® (A), Cefotaxim-Fresenius (D), Cefotaxim-MIP® (A), Cefotaxim Stragen (D), Cefotaxim-ratiopharm (D), Cefotaxim-saar® (D), Cefotaxim Sandoz® (A), Claforan® (D), Tirotax® (A)</p>                                       | 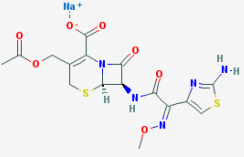   |    |    |
| <p>Cefpodoxim</p>                                                                                                                                                                                                                                                            |    |    |    |
| <p>Cefpodoximproxetil<br/>Handelsname: Biocef® (A), Cefpodoxim-ratiopharm® (D), Otreon® (A), Orelox® (D), Podomexef® (D), Prodoxsef® (A)</p>                                                                                                                                 |   |   |    |
| <p>Ceftriaxon</p>                                                                                                                                                                                                                                                            |  |  |  |
| <p>Ceftriaxon-Dinatrium<br/>Handelsnamen: Cefotrix® (A), Ceftriaxon Bradex® (A), Ceftriaxon Eberth® (A, D), Ceftriaxon Kabi® (A, D), Ceftriaxon Sandoz® (A), CEFTRIAxon Stragen (D), Ceftriaxon-MIP® (A), Ceftriaxon-ratiopharm® (D), Ceftriaxon-saar (D), Rocephin® (D)</p> |  |  |  |
| <p>Ceftazidim<br/>Handelsname: Ceftazidim Dr. Eberth (D), Ceftazidim Hikma® (A), Ceftazidim Kabi® (A, D), Ceftazidim Sandoz® (A), Ceftazidim-MI®P (A, D), Fortum® (A), Kefazim® (A)<br/>In Kombination mit Avibactam: Zavicefta® (D)</p>                                     |  |  |  |

|                                                                                                                                                  |                                                                                     |                                                                                      |                                                                                       |
|--------------------------------------------------------------------------------------------------------------------------------------------------|-------------------------------------------------------------------------------------|--------------------------------------------------------------------------------------|---------------------------------------------------------------------------------------|
| <p>Ceftibuten<br/>In A/D nicht im Handel</p>                                                                                                     | 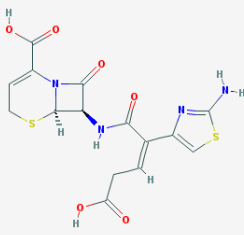   |    |                                                                                       |
| <b>Gruppe IV</b>                                                                                                                                 |                                                                                     |                                                                                      |                                                                                       |
| <p>Cefepim<br/>Handelsname:<br/>Cefepim Rotexmedica (D), Cefepim Sandoz® (A), Cefepim Stragen® (A, D), Cefepim-MIP® (A, D), Maxipime® (A, D)</p> |    |    |    |
| <b>Gruppe IVb bzw. V (gegen grampositive und gramnegative Bakterien)</b>                                                                         |                                                                                     |                                                                                      |                                                                                       |
| <p>Ceftarolinosamil</p>                                                                                                                          |   |   |   |
| <p>Ceftarolinosamilacetat<br/>Handelsname: Zinforo™ (A, D)</p>                                                                                   |  |  |  |
| <p>Ceftolozan</p>                                                                                                                                |  |  |  |
| <p>Ceftolozansulfat<br/>Handelsname: Zerbaxa® (A, D)</p>                                                                                         |  |  |  |



| Carbapeneme                                                                                                                                                                                                                                                                                                                                                                                  |                                                                                                                |                                                                                      |                                                                                      |
|----------------------------------------------------------------------------------------------------------------------------------------------------------------------------------------------------------------------------------------------------------------------------------------------------------------------------------------------------------------------------------------------|----------------------------------------------------------------------------------------------------------------|--------------------------------------------------------------------------------------|--------------------------------------------------------------------------------------|
| <p>Imipenem<br/>In Kombination mit Cilastin-Natrium:<br/>Handelsnamen: Imipenem/Cilastin AptaPharma® (A), Imipenem/Cilastin Eberth® (A), Imipenem/Cilastin Hikma® (A), Imipenem/Cilastin Kabi® (A, D), Imipenem/Cilastin Pfizer® (A), Imipenem/Cilastin Stravencon® (A), Imipenem/Cilastin Rotexmedica (D), ZIENAM® (A, D)</p>                                                               | 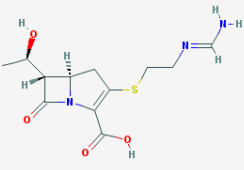                              |    |   |
| <p>Meropenem<br/>Handelsnamen: Merinfec® (A), Meronem® (D), Meropenem Accord® (A), Meropenem ActaPharma® (A), Meropenem Dr. Eberth® (D), Meropenem Dr. F. Eberth® (A), Meropenem Eberth® (A), Meropenem Hikma® (A), Meropenem Hospira (D), Meropenem Inresa (D), Meropenem Kabi® (A, D), Meropenem Noriderm (A), Meropenem Pfizer® (A), Meropenem Rotexmedica (D), Meropenem Sandoz® (A)</p> |                               |    |   |
| <p>Ertapenem<br/>Handelsname: Invanz® (A, D), Ertapenem® (A)</p>                                                                                                                                                                                                                                                                                                                             |                              |   |  |
| Monobactame                                                                                                                                                                                                                                                                                                                                                                                  |                                                                                                                |                                                                                      |                                                                                      |
| <p>Aztreonam</p>                                                                                                                                                                                                                                                                                                                                                                             |                             |  |                                                                                      |
| <p>Aztreonam-Lysin<br/>Handelsname: Azactam® (A), Cayston® (A, D)</p>                                                                                                                                                                                                                                                                                                                        | <p>Aztreonam und Lysin</p>  |  |                                                                                      |
| Betalaktamaseinhibitoren                                                                                                                                                                                                                                                                                                                                                                     |                                                                                                                |                                                                                      |                                                                                      |
| <p>Clavulansäure</p>                                                                                                                                                                                                                                                                                                                                                                         |                             |                                                                                      |                                                                                      |

|                                                                                                                                                                                                                                                                                                                                                                                                                                                                                                                                                                                                                                                    |                                                                                     |  |  |
|----------------------------------------------------------------------------------------------------------------------------------------------------------------------------------------------------------------------------------------------------------------------------------------------------------------------------------------------------------------------------------------------------------------------------------------------------------------------------------------------------------------------------------------------------------------------------------------------------------------------------------------------------|-------------------------------------------------------------------------------------|--|--|
| <p>Kalium-Clavulanat<br/>Handelsnamen in Kombination mit Amoxicillin:<br/>Amoxillin/Clavulansäure Actavis® (A), Amoxicillin/Clavulansäure A.Med® (A), Amoxicillin/Clavulansäure Krka® (A), Amoxicillin/Clavulansäure Mikro Labs® (A), Amoxiclavulan 1A Pharma® (A), Amoxicomp Genericon® (A), AmoxiPlus "ratiopharm"® (A), Amoxisaar® plus (D), Amoxillin plus Heumann (D), Amoxillin-ratiopharm comp (D), Amoxicillin-Clavulansäure Heumann (D), Amoxiclav-CT (D), Amoxistad plus® (A), Augmentan® (D), Augmentin® (A), Clavamox® (A), Curam® (A), InfectoSupramox® (D), Xiclav® (A)</p>                                                          | 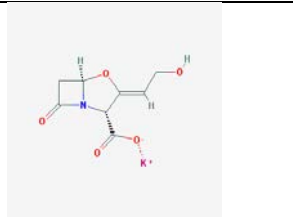   |  |  |
| <p>Sulbactam</p>                                                                                                                                                                                                                                                                                                                                                                                                                                                                                                                                                                                                                                   |    |  |  |
| <p>Sulbactam-Natrium<br/>Handelsname: Combactam® (A, D)<br/>Handelsnamen in Kombination mit Ampicillin-Natrium: Ampicillin Sulbactam IBI (D), Ampicillin/Sulbactam Kabi (D), Unacid® (D), Unasyn® (A)</p>                                                                                                                                                                                                                                                                                                                                                                                                                                          |   |  |  |
| <p>Tazobactam</p>                                                                                                                                                                                                                                                                                                                                                                                                                                                                                                                                                                                                                                  |  |  |  |
| <p>Tazobactam-Natrium:<br/>Handelsnamen:<br/>In Kombination mit Piperacillin/Tazobactam Arcana® (A), Piperacillin/Tazobactam Astro® (A), Piperacillin-Natrium: Piperacillin + Tazobactam Eberth® (D), Piperacillin/Tazobactam Ibigen® (A), Piperacillin/Tazobactam IBISQUS (D), Piperacillin/Tazobactam Kabi® (A, D), Piperacillin/Tazobactam Noriderm® (A), Piperacillin/Tazobactam Pfizer® (A), Piperacillin/Tazobactam Sandoz® (A), Piperacillin/Tazobactam Stragen (D), Piperacillin/Tazobactam Stravencon® (A), Piperacillin/Tazobactam-Teva® (D), Pipetazan® (A), Pipitaz® (A),<br/>In Kombination mit Ceftolozansulfat: Zerbaxa® (A, D)</p> |  |  |  |

Bezugsquellen: [www.rote-liste.de](http://www.rote-liste.de), [www.fachinfo.de](http://www.fachinfo.de), <https://pubchem.ncbi.nlm.nih.gov/>  
<https://asprezister.basg.gv.at/asprezister/> Ohne Anspruch auf Vollständigkeit.
